# Supplementary material
Source: PubMed Central journal article supplement (PMC4076200)
Supplement: NIHMS582262-supplement-Supplemental_Material.pdf [file NIHMS582262-supplement-Supplemental_Material.pdf]

# Supplemental Material

## Effects of Gender on Coronary Microvascular Dysfunction and Cardiac Outcomes

Venkatesh L. Murthy, M.D., Ph.D. (1,2,4); Masanao Naya, M.D., Ph.D. (2); Viviany R. Taqueti, M.D. (2,3); Courtney R. Foster, M.S. (3); Mariya Gaber, M.L.A. (3); Jon Hainer, B.S. (3); Sharmila Dorbala, MD, MPH (2,4); Ron Blankstein, M.D. (2,4); Ornella Rimoldi, M.D. (5); Paolo G. Camici, M.D. (6); and Marcelo F. Di Carli, M.D. (2,3,4)

<sup>1</sup>Departments of Internal Medicine (Division of Cardiovascular Medicine) and Radiology (Divisions of Nuclear Medicine and Cardiothoracic Imaging), University of Michigan, Ann Arbor, MI, USA; <sup>2</sup>Noninvasive Cardiovascular Imaging Program, Departments of Internal Medicine and Radiology; <sup>3</sup>Division of Nuclear Medicine and Molecular Imaging, Department of Radiology; <sup>4</sup>Division of Cardiovascular Medicine, Department of Medicine, Brigham & Women's Hospital, Boston, MA, USA; <sup>5</sup>IBFM CNR and Scientific Institute San Raffaele, Milan, Italy; <sup>6</sup>Division of Cardiology, Vita Salute University and Scientific Institute San Raffaele, Milan, Italy.

Correspondence to:  
Marcelo F. Di Carli, MD  
Brigham & Women's Hospital  
ASB-L1 037-C  
75 Francis St  
Boston, MA 02115  
Tel: 617-732-6291  
Fax: 617-582-6056  
E-mail: mdicarli@partners.org

## Table of Contents

|                                                                                    |    |
|------------------------------------------------------------------------------------|----|
| Table of Contents .....                                                            | 2  |
| Supplemental Methods .....                                                         | 3  |
| Sensitivity Analysis for Incomplete Follow-up .....                                | 3  |
| Subgroup Analysis without Coronary Calcium.....                                    | 3  |
| Subgroup Analysis with Elevated Coronary Calcium .....                             | 3  |
| Supplemental Tables .....                                                          | 4  |
| Table S1: Multivariate Linear Regression for Corrected Coronary Flow Reserve ..... | 4  |
| Table S2: Sensitivity Analysis for Incomplete Follow-Up .....                      | 5  |
| Table S3: Baseline Characteristics of CAC=0 Subgroup .....                         | 6  |
| Table S4: Predictors of Corrected CFR for CAC=0 Subgroup.....                      | 8  |
| Table S5: Clinical Outcomes in CAC=0 Subgroup .....                                | 9  |
| Table S6: Cox Regression Analysis for MACE among CAC=0 Subgroup .....              | 10 |
| Table S7: Baseline Characteristics of CAC>200 Subgroup .....                       | 11 |
| Table S8: Predictors of Corrected CFR for CAC >200 Subgroup.....                   | 13 |
| Table S9: Clinical Outcomes in CAC >200 Subgroup .....                             | 14 |
| Table S10: Cox Regression Analysis for MACE among CAC >200 Subgroup .....          | 15 |
| Supplemental Figures .....                                                         | 16 |
| Figure S1: Distribution of Overt CAD and CMD by Gender.....                        | 16 |
| Figure S2: Distribution of CFR by Gender for CAC=0 Subgroup.....                   | 17 |
| Figure S3: Outcomes by Gender and Coronary Flow Reserve for CAC=0 Subgroup.....    | 20 |
| Figure S4: Distribution of CFR by Gender for CAC >200 Subgroup.....                | 21 |
| Figure S5: Outcomes by Gender and Coronary Flow Reserve for CAC>200 Subgroup.....  | 22 |

## Supplemental Methods

### Sensitivity Analysis for Incomplete Follow-up

Because complete follow-up data was only obtained in 94% of patients, we conducted several sensitivity analyses to assess the potential impact of incomplete follow-up. Under multiple imputation, outcome (MACE versus no MACE) and time to event or censoring were imputed 25 times for each of the 74 patients with incomplete follow-up using these data and clinical covariates (age, gender, hypertension, dyslipidemia, diabetes, family history of CAD, tobacco use, history of CAD, referral for chest pain and referral for dyspnea). Prior to imputation, time to first event was transformed with the natural logarithm, after adding 1 day, in order increase normality. After imputation, the inverse transform was applied. The relative efficiency of the multiple imputation was 99.7%. Under right point imputation, each patient without complete follow-up was assumed to have no events through the end of the study period.

Regardless of whether only observed data were used or either of the imputation methods were used, similar results were obtained in survival analysis with Cox regression (Table S2). In no case was gender a significant predictor of outcome. Furthermore, no significant interaction between gender and coronary flow reserve (CFR) could be identified, suggesting the relationship between CFR and MACE is consistent, regardless of gender.

### Subgroup Analysis without Coronary Calcium

The primary analysis of this manuscript was on a cohort of patients without clinical history of coronary artery disease (CAD) who had visually normal stress myocardial perfusion imaging (MPI). Due to the limitations of stress MPI, a subset of these patients may have severe subclinical CAD. Consequently, we analyzed the subgroup of the primary cohort without any quantifiable coronary calcium (CAC=0), reflecting populations with minimal to no subclinical atherosclerosis. The baseline characteristics of this subgroup by gender are presented in Table S3. Even in this subgroup, CFR was equivalent across genders (Figure S3). Linear regression was performed to confirm that gender was not a significant predictor of coronary flow reserve (CFR) (Table S4). Clinical outcomes are summarized in Table S5. Cox regression was performed to confirm that CFR but not gender was not a significant predictor of MACE (Table S6). Microvascular dysfunction was associated with higher rates of adverse outcomes in both genders (Figure S4). Interaction terms of gender and CFR were non-significant, suggesting the relationship between CFR and outcomes was consistent across genders.

### Subgroup Analysis with Elevated Coronary Calcium

The primary analysis of this manuscript was on a cohort of patients without clinical history of coronary artery disease (CAD) who had visually normal stress myocardial perfusion imaging (MPI). Due to the limitations of stress MPI, a subset of these patients may have significant subclinical CAD. Consequently, we analyzed the subgroup of the primary cohort with significant coronary calcium (CAC>100), reflecting populations with potential for subclinical atherosclerosis. The baseline characteristics of this subgroup by gender are presented in Table S7. Even in this subgroup, CFR was equivalent across genders (Figure S5). Linear regression was performed to confirm that gender was not a significant predictor of coronary flow reserve (CFR) (Table S8). Clinical outcomes are summarized in Table S9. Cox regression was performed to confirm that CFR but not gender was not a significant predictor of MACE (Table S10). Microvascular dysfunction was associated with higher rates of adverse outcomes in both genders (Figure S6). Interaction terms of gender and CFR were non-significant, suggesting the relationship between CFR and outcomes was consistent across genders.

## Supplemental Tables

Table S1: Multivariable Predictors of Corrected Coronary Flow Reserve

| Parameter                | Model 1             |         | Model 2             |         |
|--------------------------|---------------------|---------|---------------------|---------|
|                          | Estimate            | P-Value | Estimate            | P-Value |
| R2                       | 0.165               |         | 0.166               |         |
| AIC                      | 870.4               | ref     | 870.8               | 1.00    |
| SBC                      | -271.0              | ref     | -265.5              | 1.00    |
| Variable                 | Beta                | P-Value | Beta                | P-Value |
| Intercept                | 3.53 [3.17-3.90]    | <0.0001 | 3.50 [3.13-3.87]    | <0.0001 |
| Age (y)                  | -0.01 [-0.02--0.01] | <0.0001 | -0.01 [-0.02--0.01] | <0.0001 |
| BMI (kg/m <sup>2</sup> ) | -0.02 [-0.02--0.01] | <0.0001 | -0.02 [-0.02--0.01] | <0.0001 |
| Hypertension             | -0.20 [-0.32--0.08] | 0.001   | -0.20 [-0.32--0.08] | 0.002   |
| Diabetes Mellitus        | -0.24 [-0.35--0.12] | <0.0001 | -0.24 [-0.36--0.12] | <0.0001 |
| Dialysis                 | -0.55 [-0.79--0.31] | <0.0001 | -0.56 [-0.8--0.32]  | <0.0001 |
| Preoperative Evaluation  | -0.25 [-0.39--0.11] | 0.0005  | -0.26 [-0.4--0.12]  | 0.0004  |
| EF Reserve >0            | 0.03 [0.02-0.04]    | <0.0001 | 0.03 [0.02-0.04]    | <0.0001 |
| Male Gender              |                     |         | 0.07 [-0.04-0.18]   | 0.21    |

Stepwise multivariable linear regression identified seven independent predictors of corrected coronary flow reserve (Model 1). Addition of gender (Model 2) did not improve the model. AIC = Akaike information criterion. SBC = Schwarz-Bayes criterion.

Table S2: Sensitivity Analysis for Incomplete Follow-Up in Cox Regression for MACE

|                                        | No Imputation       |         | Multiple Imputation |         | Right Point Imputation |         |
|----------------------------------------|---------------------|---------|---------------------|---------|------------------------|---------|
|                                        | Hazard Ratio        | P-Value | Hazard Ratio        | P-Value | Hazard Ratio           | P-Value |
| <b>Model 1</b>                         |                     |         |                     |         |                        |         |
| Clinical Risk Score (per 10% increase) | 1.06<br>[1.03-1.1]  | 0.0007  | 1.06<br>[1.02-1.09] | 0.0009  | 1.06<br>[1.02-1.09]    | 0.001   |
| Rest LVEF (per 10% increase)           | 0.56<br>[0.44-0.72] | <0.0001 | 0.57<br>[0.44-0.73] | <0.0001 | 0.56<br>[0.43-0.72]    | <0.0001 |
| ln(CFR) (per 10% increase)             | 0.8<br>[0.75-0.86]  | <0.0001 | 0.81<br>[0.76-0.87] | <0.0001 | 0.81<br>[0.75-0.86]    | <0.0001 |
| <b>Model 2</b>                         |                     |         |                     |         |                        |         |
| Clinical Risk Score (per 10% increase) | 1.06<br>[1.03-1.1]  | 0.0008  | 1.06<br>[1.02-1.09] | 0.001   | 1.06<br>[1.02-1.09]    | 0.002   |
| Rest LVEF (per 10% increase)           | 0.57<br>[0.44-0.74] | <0.0001 | 0.58<br>[0.44-0.75] | <0.0001 | 0.56<br>[0.44-0.73]    | <0.0001 |
| ln(CFR) (per 10% increase)             | 0.8<br>[0.75-0.86]  | <0.0001 | 0.81<br>[0.76-0.87] | <0.0001 | 0.81<br>[0.75-0.86]    | <0.0001 |
| Female Gender                          | 0.9<br>[0.55-1.45]  | 0.65    | 0.89<br>[0.55-1.44] | 0.62    | 0.93<br>[0.58-1.5]     | 0.77    |
| <b>Model 3</b>                         |                     |         |                     |         |                        |         |
| Clinical Risk Score (per 10% increase) | 1.06<br>[1.03-1.1]  | 0.0008  | 1.06<br>[1.02-1.09] | 0.001   | 1.06<br>[1.02-1.09]    | 0.002   |
| Rest LVEF (per 10% increase)           | 0.57<br>[0.45-0.74] | <0.0001 | 0.58<br>[0.45-0.75] | <0.0001 | 0.57<br>[0.44-0.73]    | <0.0001 |
| ln(CFR) (per 10% increase)             | 0.79<br>[0.73-0.85] | <0.0001 | 0.8<br>[0.74-0.86]  | <0.0001 | 0.8<br>[0.74-0.86]     | <0.0001 |
| ln(CFR)*Gender Interaction             |                     | 0.42    |                     | 0.38    |                        | 0.45    |
| ln(CFR) (per 10% increase) - Men       | 0.82<br>[0.76-0.88] |         | 0.83<br>[0.76-0.89] |         | 0.82<br>[0.76-0.89]    |         |
| ln(CFR) (per 10% increase) - Women     | 0.79<br>[0.73-0.85] |         | 0.8<br>[0.74-0.86]  |         | 0.8<br>[0.74-0.86]     |         |

Table S3: Baseline Characteristics of CAC=0 Subgroup by Gender

| Variable                               | CAC=0            |                  | P-Value |
|----------------------------------------|------------------|------------------|---------|
|                                        | Males (N=97)     | Females (N=307)  |         |
| <i>Demographics</i>                    |                  |                  |         |
| Age (y)                                | 53.1 [45.5-59.1] | 56.8 [49.2-63.5] | 0.001   |
| Hispanic                               | 11 (11.3)        | 68 (22.2)        | 0.02    |
| Race                                   |                  |                  |         |
| White                                  | 49 (50.5)        | 133 (43.3)       | 0.12    |
| Black                                  | 29 (29.9)        | 81 (26.4)        |         |
| Other/Unknown                          | 19 (19.6)        | 93 (30.3)        |         |
| <i>Risk Factors</i>                    |                  |                  |         |
| BMI (kg/m <sup>2</sup> )               | 29.4 [25.1-37.6] | 31.9 [26.6-40.4] | 0.09    |
| BMI ≥ 30 kg/m <sup>2</sup>             | 44 (45.4)        | 177 (57.7)       | 0.04    |
| Hypertension                           | 58 (59.8)        | 210 (68.4)       | 0.14    |
| Dyslipidemia                           | 41 (42.3)        | 157 (51.1)       | 0.13    |
| Diabetes Mellitus                      | 24 (24.7)        | 92 (30)          | 0.37    |
| Family history of CAD                  | 23 (23.7)        | 100 (32.6)       | 0.10    |
| Tobacco Use                            | 19 (19.6)        | 26 (8.5)         | 0.005   |
| Modified Duke Clinical Risk (%)        | 17 [10-27]       | 24 [12-39]       | 0.004   |
| Dialysis                               | 4 (4.1)          | 9 (2.9)          | 0.52    |
| <i>Medications</i>                     |                  |                  |         |
| Aspirin                                | 47 (48.5)        | 134 (43.6)       | 0.41    |
| β-adrenergic Blockers                  | 26 (26.8)        | 122 (39.7)       | 0.02    |
| Cholesterol agents                     | 33 (34.0)        | 129 (42.0)       | 0.19    |
| Insulin                                | 8 (8.2)          | 31 (10.1)        | 0.7     |
| Oral hypoglycemic                      | 10 (10.3)        | 40 (13.0)        | 0.6     |
| Ca-channel blockers                    | 15 (15.5)        | 48 (15.6)        | 1.00    |
| ACE inhibitors                         | 29 (29.9)        | 92 (30.0)        | 1.00    |
| Nitrates                               | 7 (7.2)          | 14 (4.6)         | 0.3     |
| Diuretics                              | 16 (16.5)        | 80 (26.1)        | 0.06    |
| <i>Symptoms &amp; Test Indications</i> |                  |                  |         |
| Chest Pain                             | 47 (48.5)        | 212 (69.0)       | 0.0004  |
| Dyspnea                                | 22 (22.7)        | 94 (30.6)        | 0.16    |
| Pre-operative                          | 15 (15.5)        | 31 (10.1)        | 0.15    |
| Other                                  | 6 (6.2)          | 30 (9.8)         | 0.32    |

*Imaging Findings*

|                                                 |                  |                  |         |
|-------------------------------------------------|------------------|------------------|---------|
| Rest LVEF (%)                                   | 58 [52-62]       | 64 [58-71]       | <0.0001 |
| LVEF reserve                                    | 91 (93.8)        | 276 (89.9)       | 0.31    |
| Stress MBF (ml/g/min)                           | 1.93 [1.35-2.53] | 2.36 [1.83-3.32] | <0.0001 |
| Rest MBF (ml/g/min)                             | 0.88 [0.68-1.13] | 1.15 [0.91-1.53] | <0.0001 |
| Corrected Rest MBF (ml/g/min)                   | 0.86 [0.66-1.23] | 1.17 [0.84-1.70] | <0.0001 |
| CFR                                             | 2.04 [1.58-2.49] | 2.05 [1.64-2.57] | 0.98    |
| Corrected CFR                                   | 1.98 [1.36-2.77] | 1.93 [1.42-2.67] | 1.00    |
| Coronary Microvascular<br>Dysfunction (CFR<2.0) | 43 (44.3)        | 147 (47.9)       | 0.56    |

Clinical and imaging characteristics of patients by gender among the subgroup with zero coronary artery calcium score (CAC=0). Corrected rest myocardial blood flow (MBF) is computed by multiplying by the rest rate-pressure product/10000. Coronary flow reserve (CFR) is computed as the ratio of stress/rest MBF. Continuous variables are presented as median with inter-quartile range. Binary variables are presented as absolute numbers and percentages. Comparisons across gender were performed using Wilcoxon, Fisher exact and chi-square tests for continuous, binary and categorical variables, respectively.

Table S4: Multivariable Predictors of Corrected CFR for CAC=0 Subgroup

| Parameter                | CAC=0               |         |                     |         |
|--------------------------|---------------------|---------|---------------------|---------|
|                          | Model 1             |         | Model 2             |         |
|                          | Estimate            | P-Value | Estimate            | P-Value |
| R <sup>2</sup>           | 0.114               |         | 0.114               |         |
| AIC                      | 347.2               | ref     | 349.2               | 1       |
| SBC                      | -20.9               | ref     | -14.9               | 1       |
| Variable                 | Beta                | P-Value | Beta                | P-Value |
| Intercept                | 3.04 [2.35-3.73]    | <0.0001 | 3.05 [2.34-3.76]    | <0.0001 |
| Age (y)                  | -0.01 [-0.02-0.00]  | 0.11    | -0.01 [-0.02-0.00]  | 0.11    |
| BMI (kg/m <sup>2</sup> ) | -0.02 [-0.03--0.01] | 0.003   | -0.02 [-0.03--0.01] | 0.003   |
| Hypertension             | -0.13 [-0.34-0.07]  | 0.21    | -0.13 [-0.34-0.07]  | 0.21    |
| Diabetes Mellitus        | -0.2 [-0.42-0.01]   | 0.07    | -0.21 [-0.42-0.01]  | 0.07    |
| Dialysis                 | -0.39 [-0.95-0.17]  | 0.17    | -0.39 [-0.95-0.17]  | 0.17    |
| Preoperative Evaluation  | -0.35 [-0.64--0.05] | 0.02    | -0.34 [-0.64--0.05] | 0.02    |
| EF Reserve >0            | 0.04 [0.02-0.05]    | <0.0001 | 0.04 [0.02-0.05]    | <0.0001 |
| Male Gender              |                     |         | -0.02 [-0.24-0.2]   | 0.88    |

Multivariable linear regression using the seven independent predictors of corrected coronary flow reserve identified in the overall cohort (Model 1). Addition of gender (Model 2) did not improve the model. AIC = Akaike information criterion. SBC = Schwarz-Bayes criterion.



Table S5: Clinical Outcomes in CAC=0 Subgroup by CFR

| Outcome                 | CAC=0               |                     |                         | P-Value |
|-------------------------|---------------------|---------------------|-------------------------|---------|
|                         | CFR <2.0<br>(N=190) | CFR ≥2.0<br>(N=214) | All Subjects<br>(N=404) |         |
| MACE                    | 13 (6.8)            | 4 (1.9)             | 17 (4.2)                | 0.02    |
| Death                   | 6 (3.2)             | 2 (0.9)             | 8 (2)                   | 0.16    |
| Cardiac Death           | 2 (1.1)             | 0 (0)               | 2 (0.5)                 | 0.22    |
| Myocardial Infarction   | 8 (4.2)             | 0 (0)               | 8 (2)                   | 0.002   |
| Late Revascularization  | 1 (0.5)             | 0 (0)               | 1 (0.2)                 | 0.47    |
| Heart Failure Admission | 5 (2.6)             | 4 (1.9)             | 9 (2.2)                 | 0.74    |

Major adverse cardiac outcomes (MACE) indicates the composite of death resulting from any cardiac cause, myocardial infarction, late revascularization (after 90 days) and admission for congestive heart failure.

Table S6: Multivariable Cox Regression for MACE among CAC=0 Subgroup

| Fit Statistic                           | Model 1             |         | Model 2             |         | Model 3              |         | Model 4             |                            |
|-----------------------------------------|---------------------|---------|---------------------|---------|----------------------|---------|---------------------|----------------------------|
|                                         | Estimate            | P-Value | Estimate            | P-Value | Estimate             | P-Value | Estimate            | P-Value                    |
| Global $\chi^2$                         | 4.9                 | ref     | 15.2                | 0.0001  | 15.3                 | 0.69    | 16.1                | 0.33                       |
| AIC                                     | 155.7               | ref     | 147.4               | 0.0004  | 149.3                | 1       | 148.5               | 1                          |
| SBC                                     | 157.4               | ref     | 149.9               | 0.0006  | 152.6                | 1       | 151.8               | 1                          |
| Variable                                | Hazard Ratio        | P-Value | Hazard Ratio        | P-Value | Hazard Ratio         | P-Value | Hazard Ratio        | P-Value                    |
| <i>Clinical Risk (per 10% increase)</i> | 1.04<br>[0.98-1.10] | 0.24    | 1.03<br>[0.97-1.09] | 0.39    | 1.03<br>[0.97-1.09]  | 0.38    | 1.03<br>[0.97-1.09] | 0.37                       |
| <i>Rest LVEF (per 10% increase)</i>     | 0.61<br>[0.37-1.00] | 0.05    | 0.66<br>[0.41-1.05] | 0.08    | 0.67<br>[0.42-1.09]  | 0.11    | 0.69<br>[0.43-1.12] | 0.13                       |
| <i>ln(CFR) (per 10% increase)</i>       |                     |         | 0.82<br>[0.72-0.92] | 0.001   | 0.81<br>[0.72-0.92]  | 0.0009  | 0.80<br>[0.70-0.91] | 0.06                       |
| <i>Female Gender</i>                    |                     |         |                     |         | 0.78 [0.24-<br>2.59] | 0.69    |                     |                            |
| <i>Gender*ln(CFR) Interaction</i>       |                     |         |                     |         |                      |         |                     |                            |
| <i>Female (per 10% increase in CFR)</i> |                     |         |                     |         |                      |         | 0.80<br>[0.70-0.91] | 0.32<br>(women<br>vs. men) |
| <i>Male (per 10% increase in CFR)</i>   |                     |         |                     |         |                      |         | 0.86<br>[0.74-1.01] |                            |

Values in square brackets indicate 95% confidence intervals. MACE indicates Major Adverse Cardiac Events. SBC indicates Schwarz-Bayes Criteria. AIC indicates Akaike's information criterion. NRI indicates net reclassification improvement. Categorical NRI was computed with threshold rates of 1 and 3% per year to define low, intermediate and high risk categories. IDI indicates integrated discrimination index. NRI, IDI and P-values for fit statistics compare Model 2 vs. Model 1, Model 3 vs. Model 2, Model 4 vs. Model 2, respectively. C-index, NRI and relative IDI are computed at two years. Clinical risk indicates the Duke clinical risk score<sup>21</sup> modified to be gender neutral. CFR indicates coronary flow reserve without correction for rate-pressure product. LVEF indicates left ventricular ejection fraction.

Table S7: Baseline Characteristics of CAC&gt;100 Subgroup by Gender

| Variable                               | CAC>100          |                  | P-Value |
|----------------------------------------|------------------|------------------|---------|
|                                        | Males (N=121)    | Females (N=159)  |         |
| <i>Demographics</i>                    |                  |                  |         |
| Age (y)                                | 66 [60.1-73]     | 69.7 [62.4-77.1] | 0.008   |
| Hispanic                               | 8 (6.6)          | 23 (14.5)        | 0.05    |
| Race                                   |                  |                  |         |
| White                                  | 85 (53.5)        | 91 (75.2)        | 0.0002  |
| Black                                  | 36 (22.6)        | 9 (7.4)          |         |
| Other/Unknown                          | 38 (23.9)        | 21 (17.4)        |         |
| <i>Risk Factors</i>                    |                  |                  |         |
| BMI (kg/m <sup>2</sup> )               | 29.4 [25.7-35.9] | 30.2 [25.3-35.5] | 0.96    |
| BMI ≥ 30 kg/m <sup>2</sup>             | 58 (47.9)        | 83 (52.2)        | 0.55    |
| Hypertension                           | 92 (76)          | 148 (93.1)       | 0.0001  |
| Dyslipidemia                           | 74 (61.2)        | 104 (65.4)       | 0.53    |
| Diabetes Mellitus                      | 43 (35.5)        | 57 (35.8)        | 1       |
| Family history of CAD                  | 28 (23.1)        | 31 (19.5)        | 0.46    |
| Tobacco Use                            | 16 (13.2)        | 16 (10.1)        | 0.45    |
| Modified Duke Clinical Risk (%)        | 41 [28-55]       | 48 [34-63]       | 0.002   |
| Dialysis                               | 11 (9.1)         | 10 (6.3)         | 0.49    |
| <i>Medications</i>                     |                  |                  |         |
| Aspirin                                | 57 (47.1)        | 81 (50.9)        | 0.55    |
| β-adrenergic Blockers                  | 60 (49.6)        | 85 (53.5)        | 0.55    |
| Cholesterol agents                     | 66 (54.5)        | 88 (55.3)        | 0.9     |
| Insulin                                | 14 (11.6)        | 25 (15.7)        | 0.38    |
| Oral hypoglycemic                      | 15 (12.4)        | 16 (10.1)        | 0.57    |
| Ca-channel blockers                    | 24 (19.8)        | 52 (32.7)        | 0.02    |
| ACE inhibitors                         | 46 (38)          | 68 (42.8)        | 0.46    |
| Nitrates                               | 6 (5)            | 9 (5.7)          | 1       |
| Diuretics                              | 32 (26.4)        | 68 (42.8)        | 0.006   |
| <i>Symptoms &amp; Test Indications</i> |                  |                  |         |
| Chest Pain                             | 45 (37.2)        | 82 (51.6)        | 0.02    |
| Dyspnea                                | 33 (27.3)        | 43 (27)          | 1       |
| Pre-operative                          | 27 (22.3)        | 30 (18.9)        | 0.55    |
| Other                                  | 10 (8.3)         | 18 (11.3)        | 0.43    |

*Imaging Findings*

|                                                 |                  |                  |         |
|-------------------------------------------------|------------------|------------------|---------|
| Rest LVEF (%)                                   | 59 [52-64]       | 65 [59-72]       | <0.0001 |
| LVEF reserve                                    | 106 (87.6)       | 141 (88.7)       | 0.85    |
| CAC                                             | 447 [221-1044]   | 341 [199-618]    | 0.02    |
| Stress MBF (ml/g/min)                           | 1.68 [1.21-2.44] | 2.2 [1.76-2.83]  | <0.0001 |
| Rest MBF (ml/g/min)                             | 0.96 [0.79-1.11] | 1.23 [0.94-1.52] | <0.0001 |
| Corrected Rest MBF (ml/g/min)                   | 0.93 [0.71-1.19] | 1.3 [0.94-1.78]  | <0.0001 |
| CFR                                             | 1.86 [1.45-2.27] | 1.76 [1.49-2.17] | 0.65    |
| Corrected CFR                                   | 1.86 [1.42-2.44] | 1.63 [1.24-2.19] | 0.009   |
| Coronary Microvascular<br>Dysfunction (CFR<2.0) | 71 (58.7)        | 100 (62.9)       | 0.54    |

Clinical and imaging characteristics of patients by gender among the subgroup with significant coronary artery calcium (CAC >100). Corrected rest myocardial blood flow (MBF) is computed by multiplying by the rest rate-pressure product/10000. Coronary flow reserve (CFR) is computed as the ratio of stress/rest MBF. Continuous variables are presented as median with inter-quartile range. Binary variables are presented as absolute numbers and percentages. Comparisons across gender were performed using Wilcoxon, Fisher exact and chi-square tests for continuous, binary and categorical variables, respectively.

Table S8: Multivariable Predictors of Corrected CFR for CAC &gt;100 Subgroup

| <b>CAC &gt;100</b>       |                     |                |                     |                |
|--------------------------|---------------------|----------------|---------------------|----------------|
| <b>Parameter</b>         | <b>Model 1</b>      |                | <b>Model 2</b>      |                |
|                          | <b>Estimate</b>     | <b>P-Value</b> | <b>Estimate</b>     | <b>P-Value</b> |
| R <sup>2</sup>           | 0.134               |                | 0.158               |                |
| AIC                      | 144.7               | ref            | 138.8               | 0.02           |
| SBC                      | -99.8               | ref            | -102                | 0.14           |
| <b>Variable</b>          | <b>Beta</b>         | <b>P-Value</b> | <b>Beta</b>         | <b>P-Value</b> |
| Intercept                | 3.06 [2.06-4.06]    | <0.0001        | 2.84 [1.85-3.84]    | <0.0001        |
| Age (y)                  | -0.01 [-0.02-0]     | 0.04           | -0.01 [-0.02-0]     | 0.13           |
| BMI (kg/m <sup>2</sup> ) | -0.01 [-0.02-0.01]  | 0.33           | -0.01 [-0.02-0.01]  | 0.33           |
| Hypertension             | -0.18 [-0.44-0.08]  | 0.18           | -0.08 [-0.35-0.19]  | 0.55           |
| Diabetes Mellitus        | -0.23 [-0.43--0.02] | 0.03           | -0.21 [-0.41--0.02] | 0.04           |
| Dialysis                 | -0.38 [-0.76--0.01] | 0.047          | -0.36 [-0.73-0.01]  | 0.06           |
| Preoperative Evaluation  | -0.08 [-0.31-0.15]  | 0.51           | -0.1 [-0.33-0.13]   | 0.40           |
| EF Reserve >0            | 0.04 [0.02-0.06]    | <0.0001        | 0.04 [0.02-0.06]    | <0.0001        |
| ln(CAC)                  | -0.05 [-0.15-0.06]  | 0.38           | -0.07 [-0.18-0.03]  | 0.16           |
| Male Gender              |                     |                | 0.28 [0.08-0.47]    | 0.006          |

Multivariable linear regression using the seven independent predictors of corrected coronary flow reserve identified in the overall cohort plus the natural log of coronary artery calcium (CAC) score (Model 1). Addition of gender (Model 2) did not improve the model. AIC = Akaike information criterion. SBC = Schwarz-Bayes criterion.

Table S9: Clinical Outcomes in CAC &gt;100 Subgroup by CFR

| Outcome                 | CAC >100            |                     |                         | P-Value |
|-------------------------|---------------------|---------------------|-------------------------|---------|
|                         | CFR <2.0<br>(N=171) | CFR ≥2.0<br>(N=109) | All Subjects<br>(N=280) |         |
| MACE                    | 25 (14.6)           | 7 (6.4)             | 32 (11.4)               | 0.05    |
| Death                   | 10 (5.8)            | 2 (1.8)             | 12 (4.3)                | 0.14    |
| Cardiac Death           | 4 (2.3)             | 0 (0)               | 4 (1.4)                 | 0.16    |
| Myocardial Infarction   | 12 (7)              | 5 (4.6)             | 17 (6.1)                | 0.45    |
| Late Revascularization  | 8 (4.7)             | 4 (3.7)             | 12 (4.3)                | 0.77    |
| Heart Failure Admission | 10 (5.8)            | 2 (1.8)             | 12 (4.3)                | 0.14    |

Major adverse cardiac outcomes (MACE) indicates the composite of death resulting from any cardiac cause, myocardial infarction, late revascularization (after 90 days) and admission for congestive heart failure.

Table S10: Multivariable Cox Regression for MACE among CAC &gt;100 Subgroup

| Fit Statistic                           | CAC >100            |         |                     |         |                     |         |                     |                            |
|-----------------------------------------|---------------------|---------|---------------------|---------|---------------------|---------|---------------------|----------------------------|
|                                         | Model 1             |         | Model 2             |         | Model 3             |         | Model 4             |                            |
|                                         | Estimate            | P-Value | Estimate            | P-Value | Estimate            | P-Value | Estimate            | P-Value                    |
| Global $\chi^2$                         | 6.309               | ref     | 14.716              | 0.004   | 14.932              | 0.64    | 15.967              | 0.26                       |
| AIC                                     | 250.851             | ref     | 244.444             | 0.01    | 246.227             | 1.00    | 245.193             | 1.00                       |
| SBC                                     | 255.248             | ref     | 250.306             | 0.03    | 253.556             | 1.00    | 252.522             | 1.00                       |
| Variable                                | Hazard Ratio        | P-Value                    |
| <i>Clinical Risk (per 10% increase)</i> | 1.05<br>[0.98-1.13] | 0.17    | 1.06<br>[0.98-1.14] | 0.14    | 1.06<br>[0.98-1.15] | 0.13    | 1.07<br>[0.99-1.15] | 0.11                       |
| <i>Rest LVEF (per 10% increase)</i>     | 0.73<br>[0.5-1.06]  | 0.10    | 0.66<br>[0.45-0.97] | 0.04    | 0.68<br>[0.46-1.01] | 0.06    | 0.67<br>[0.46-0.99] | 0.046                      |
| <i>Ln(CAC) (per 10% increase)</i>       | 1.02<br>[0.98-1.06] | 0.30    | 1.02<br>[0.99-1.06] | 0.27    | 1.02<br>[0.99-1.06] | 0.27    | 1.02<br>[0.99-1.06] | 0.24                       |
| <i>ln(CFR) (per 10% increase)</i>       |                     |         | 0.83<br>[0.74-0.94] | 0.004   | 0.84<br>[0.74-0.95] | 0.006   | 0.81<br>[0.7-0.93]  | 0.04                       |
| <i>Female Gender</i>                    |                     |         |                     |         | 0.84<br>[0.39-1.78] | 0.64    |                     |                            |
| <i>Gender*ln(CFR) Interaction</i>       |                     |         |                     |         |                     |         |                     |                            |
| <i>Female (per 10% increase in CFR)</i> |                     |         |                     |         |                     |         | 0.81<br>[0.7-0.93]  | 0.26<br>(women<br>vs. men) |
| <i>Male (per 10% increase in CFR)</i>   |                     |         |                     |         |                     |         | 0.87<br>[0.76-0.99] |                            |

Clinical risk indicates the Duke clinical risk score modified to be gender neutral. CFR indicates coronary flow reserve without correction for rate-pressure product. LVEF indicated left ventricular ejection fraction. P-values for fit statistics compare Model 1 vs. Model 0, Model 2 vs. Model 1 and Model 3 vs. Model 1, respectively.

## Supplemental Figures

Figure S1: Proportions of Men and Women with Overt CAD and CMD

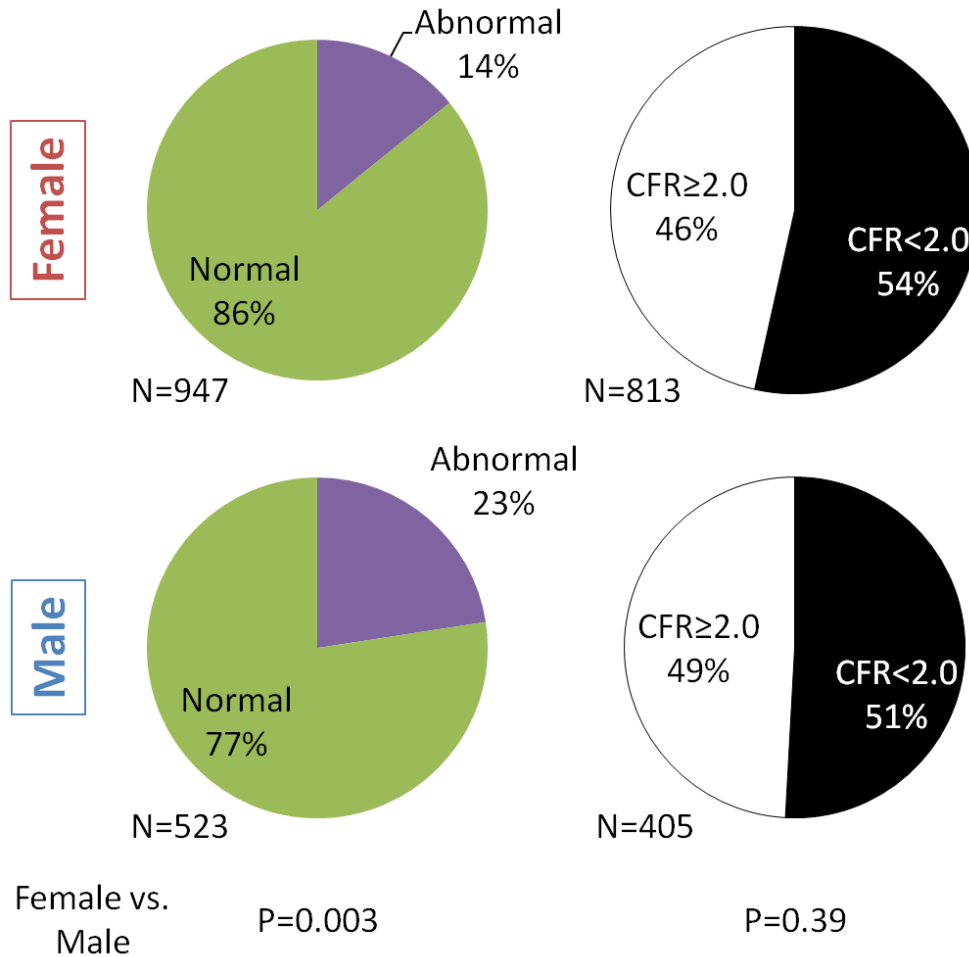

Among patients referred to our laboratory, more women (N=947) than men (N=523) were free of history of coronary artery disease (CAD), myocardial infarction or coronary revascularization. Furthermore, abnormal stress myocardial perfusion imaging (purple) was more common among men (23%) than women (14%,  $P=0.003$ ). These factors combined to result in a study population dominated by women (N=813 of 1218). Among these patients without history of CAD or visual evidence of myocardial infarction or ischemia, approximately half of both men and women had coronary microvascular dysfunction (CMD), indicated by diminished coronary flow reserve (CFR<2.0, black) ( $P(\text{Fisher exact test})=0.39$ ;  $P(\text{equivalence})=0.0002$ ).



Figure S2: Annualized Rate of MACE across Quartiles of CFR

A

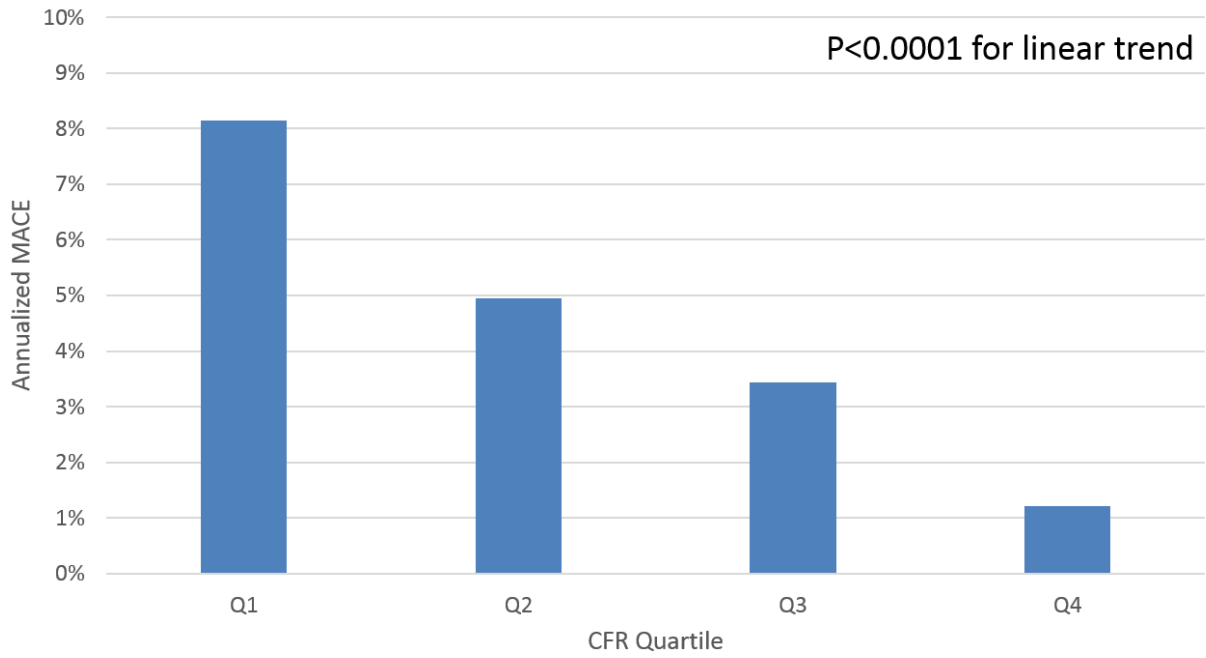

B

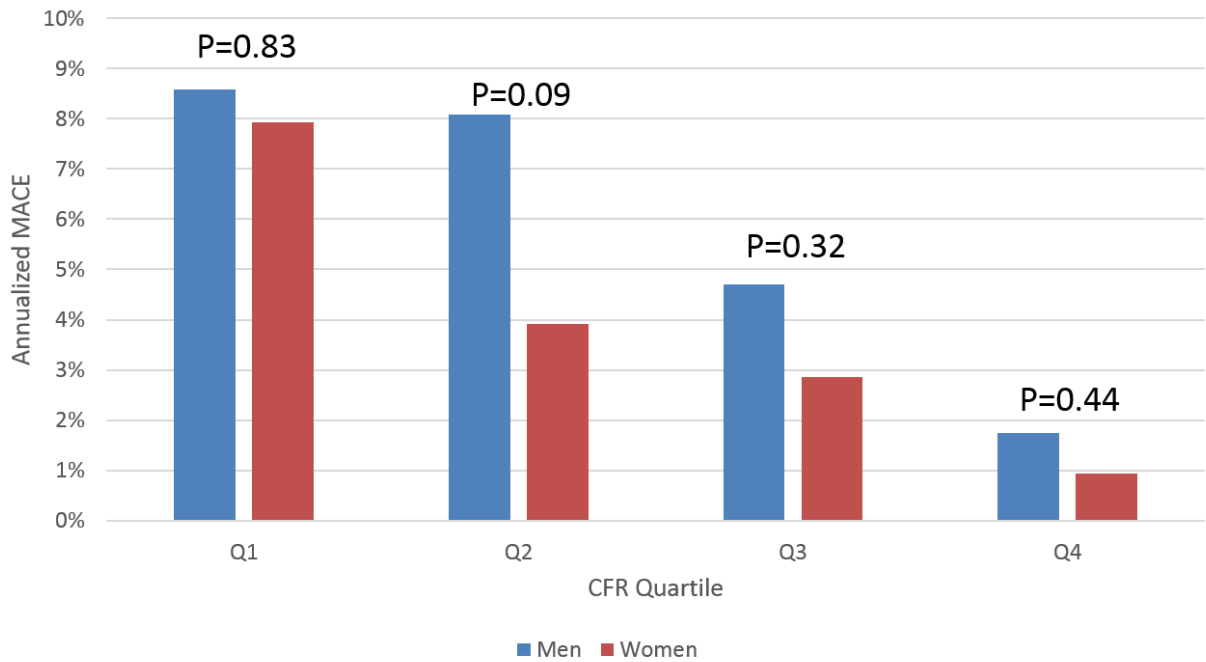

Unadjusted annualized rate of major adverse cardiac events (MACE) across quartiles of coronary flow reserve (CFR) (panel A) showing a monotonic trend towards higher rates of adverse events with decreasing CFR. In each quartile

of CFR, no significant differences in annualized MACE were seen across genders (panel B), with only a trend towards worse outcomes in men than women in Quartile 2. Comparisons were performed with Poisson regression.

Figure S3: Distribution of CFR by Gender for CAC=0 Subgroup

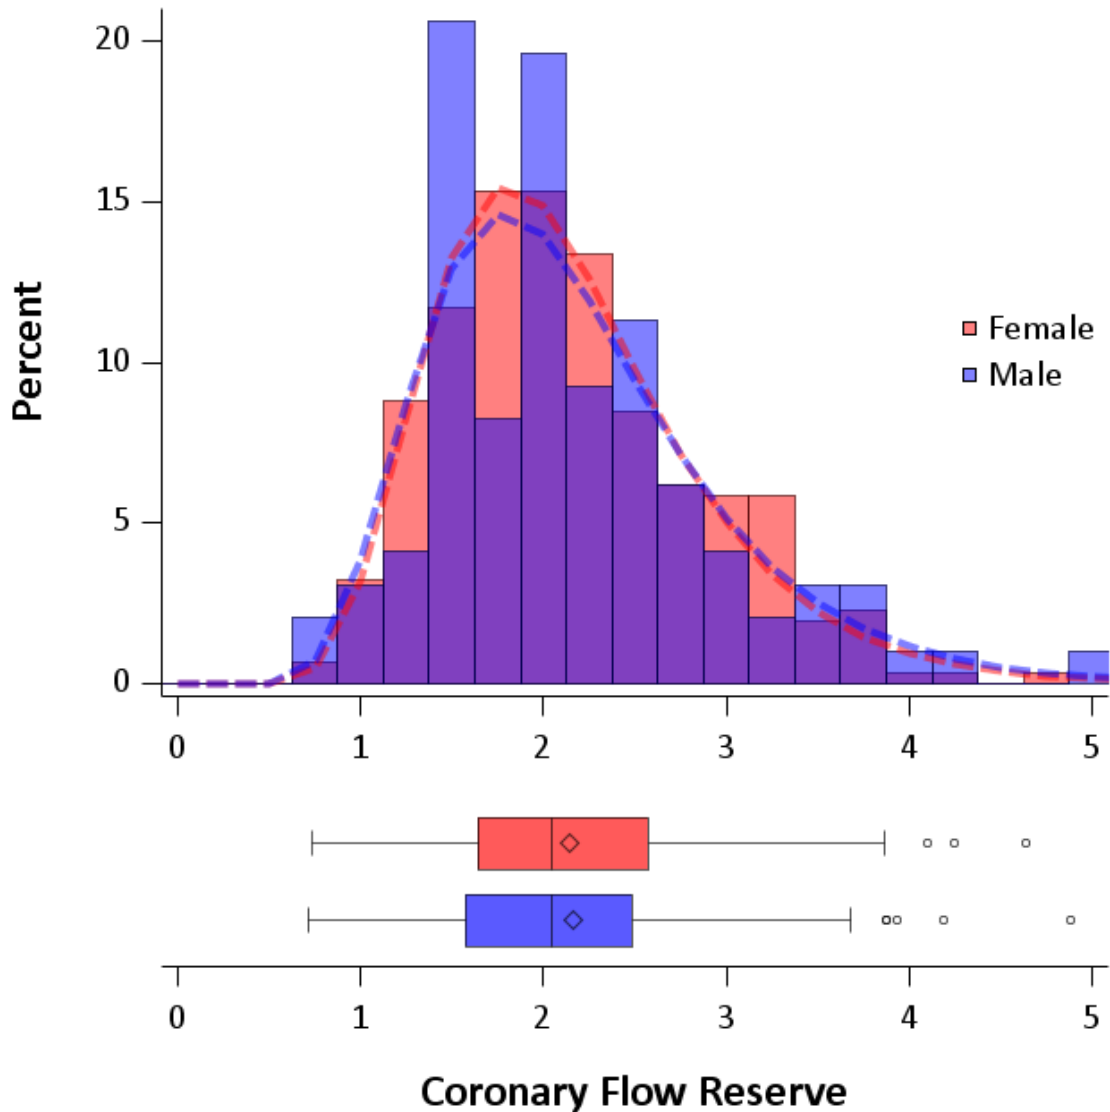

Histograms (top) showing the distribution of coronary flow reserve (CFR) for men (blue) and women (red) among the subgroup with zero coronary artery calcium score (CAC=0). Areas of overlap are shown in purple. Fitted log-normal distribution for men (dashed blue line) and women (dashed red line) are also displayed. Similar data are also shown in box plots (bottom). No statistically significant difference was seen between genders using t-test with log-normal distribution ( $P=0.93$ ). CFR was equivalent between the genders ( $P=0.01$  for <10% difference) using two one-sided tests and log-normal distribution.

Figure S4: Cumulative Incidence of MACE by Gender and Coronary Flow Reserve for CAC=0 Subgroup

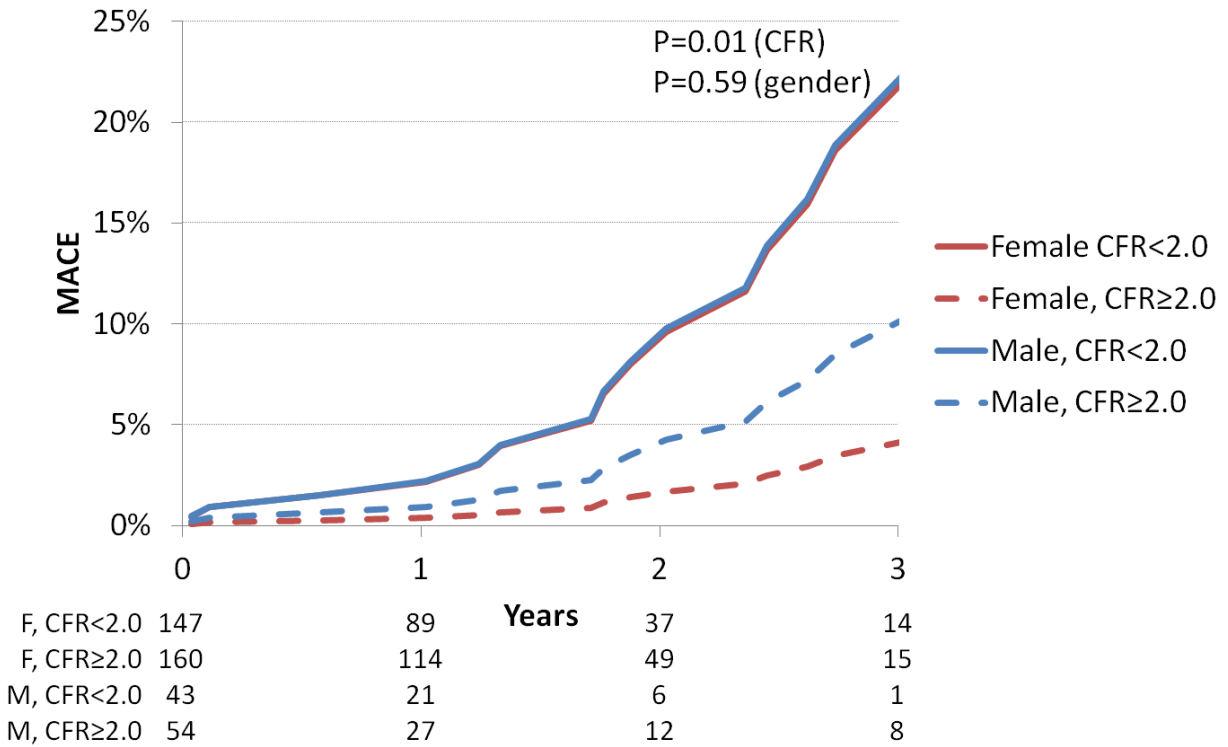

Adjusted cumulative rate of major adverse cardiac events (MACE) by gender and coronary flow reserve (CFR) among subjects with zero coronary artery calcium score (CAC=0). Data are adjusted for the modified Duke clinical risk score and rest LVEF. The curves for women with CFR<2.0 (solid red) and men with CFR<2.0 (solid blue) are nearly overlapping.

Figure S5: Distribution of CFR by Gender for CAC &gt;100 Subgroup

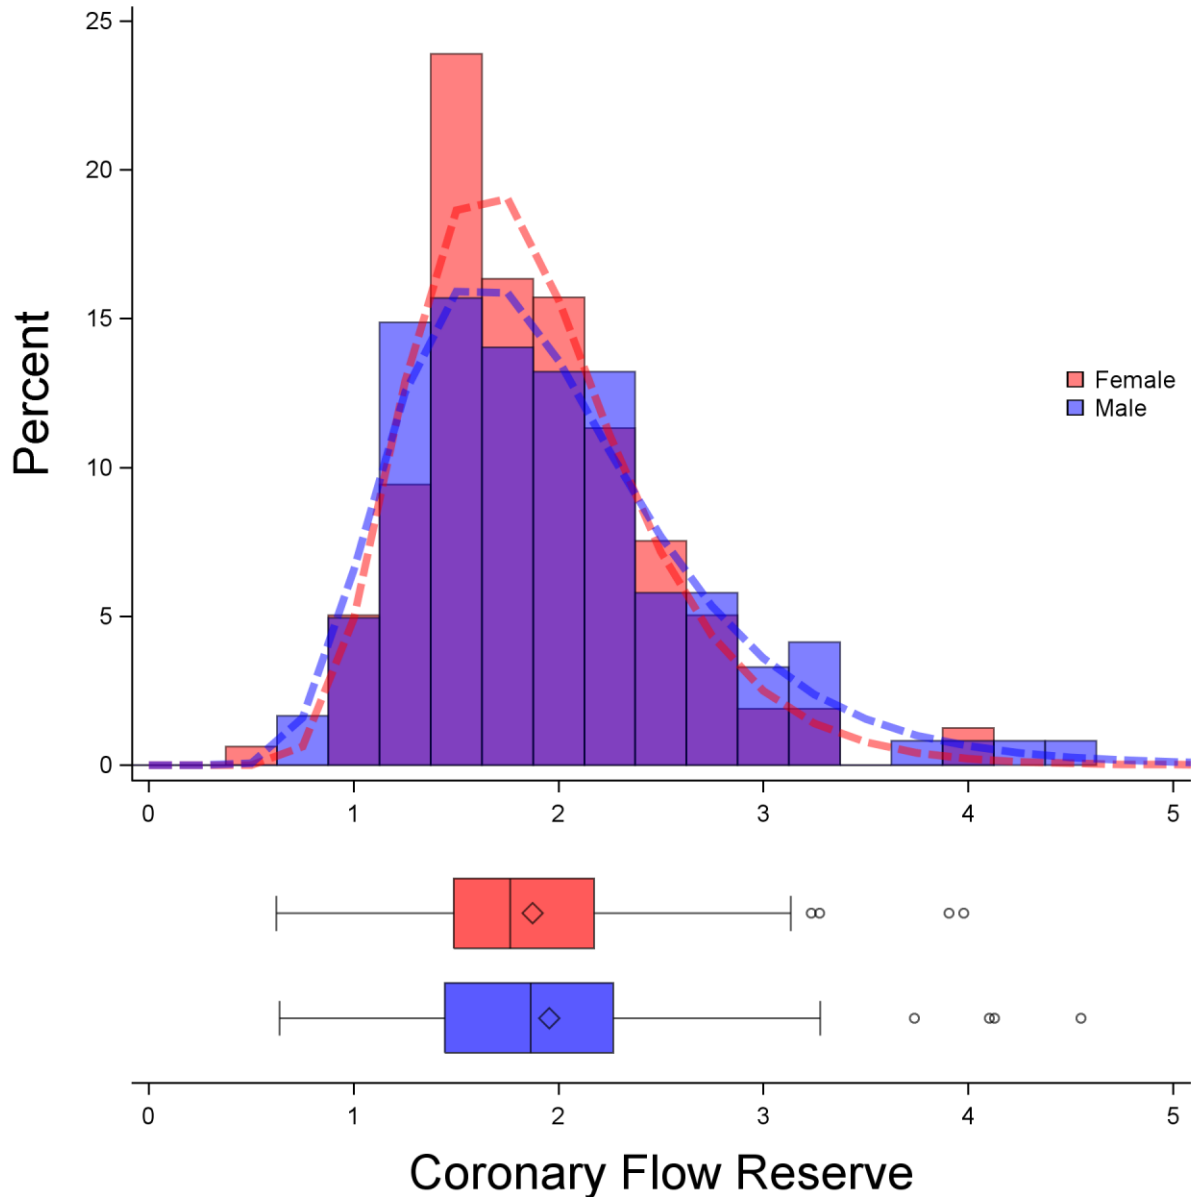

Histograms (top) showing the distribution of coronary flow reserve (CFR) for men (blue) and women (red) among the subgroup with significant coronary artery calcium (CAC >100). Areas of overlap are shown in purple. Fitted log-normal distribution for men (dashed blue line) and women (dashed red line) are also displayed. Similar data are also shown in box plots (bottom). No statistically significant difference was seen between genders using t-test with log-normal distribution ( $P=0.56$ ). CFR was equivalent between the genders ( $P=0.037$  for <10% difference) using two one-sided tests and log-normal distribution..

Figure S6: Cumulative Incidence of MACE by Gender and Coronary Flow Reserve for CAC>100 Subgroup

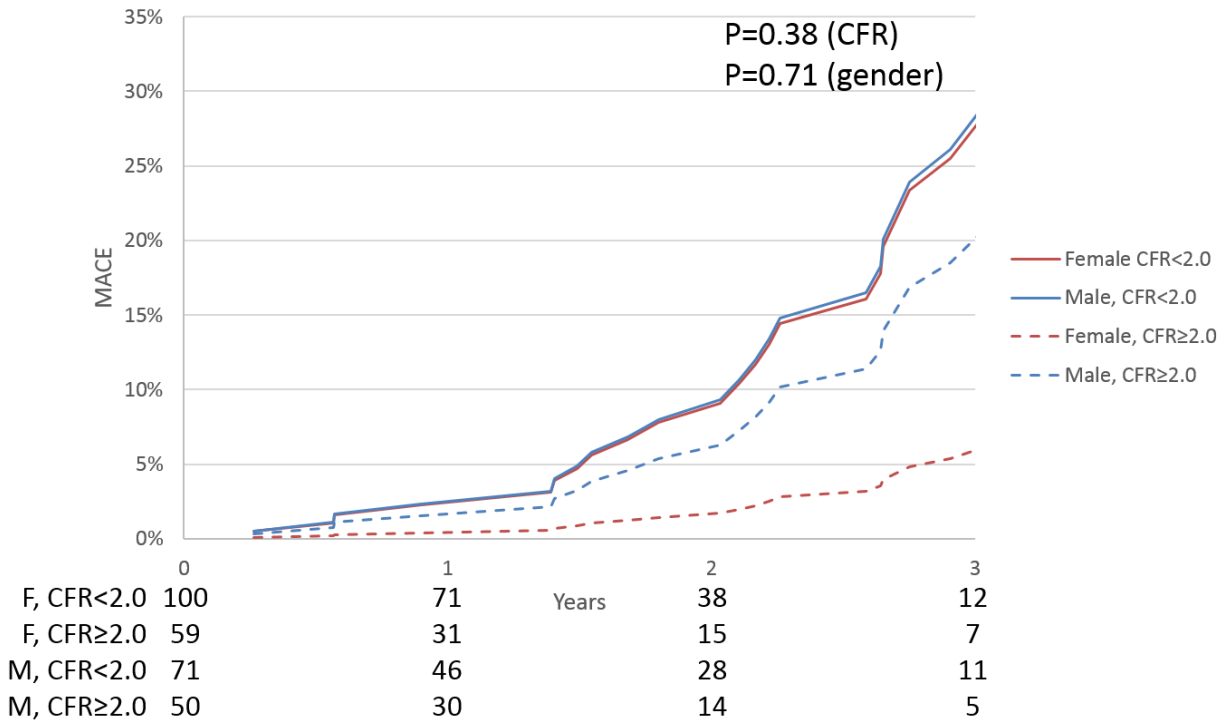

Adjusted cumulative rate of major adverse cardiac events (MACE) by gender and coronary flow reserve (CFR) among subjects with significant coronary artery calcium score (CAC>100). Data are adjusted for the modified Duke clinical risk score and rest LVEF. The curves for women with CFR<2.0 (solid red) and men with CFR<2.0 (solid blue) are nearly overlapping.
